# Supplementary material for: Glyoxal tropospheric column retrievals from TROPOMI – multi-satellite intercomparison and ground-based validation
Source: Copernicus journal article supplement (doi:10.5194/amt-14-7775-2021), 2021-12-10
Supplement: Supplementary file 1 [file amt-14-7775-2021-supplement.pdf]

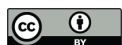

*Supplement of*

## **Glyoxal tropospheric column retrievals from TROPOMI – multi-satellite intercomparison and ground-based validation**

**Christophe Lerot et al.**

*Correspondence to:* Christophe Lerot ([christophe.lerot@aeronomie.be](mailto:christophe.lerot@aeronomie.be))

The copyright of individual parts of the supplement might differ from the article licence.

## Supplementary figures

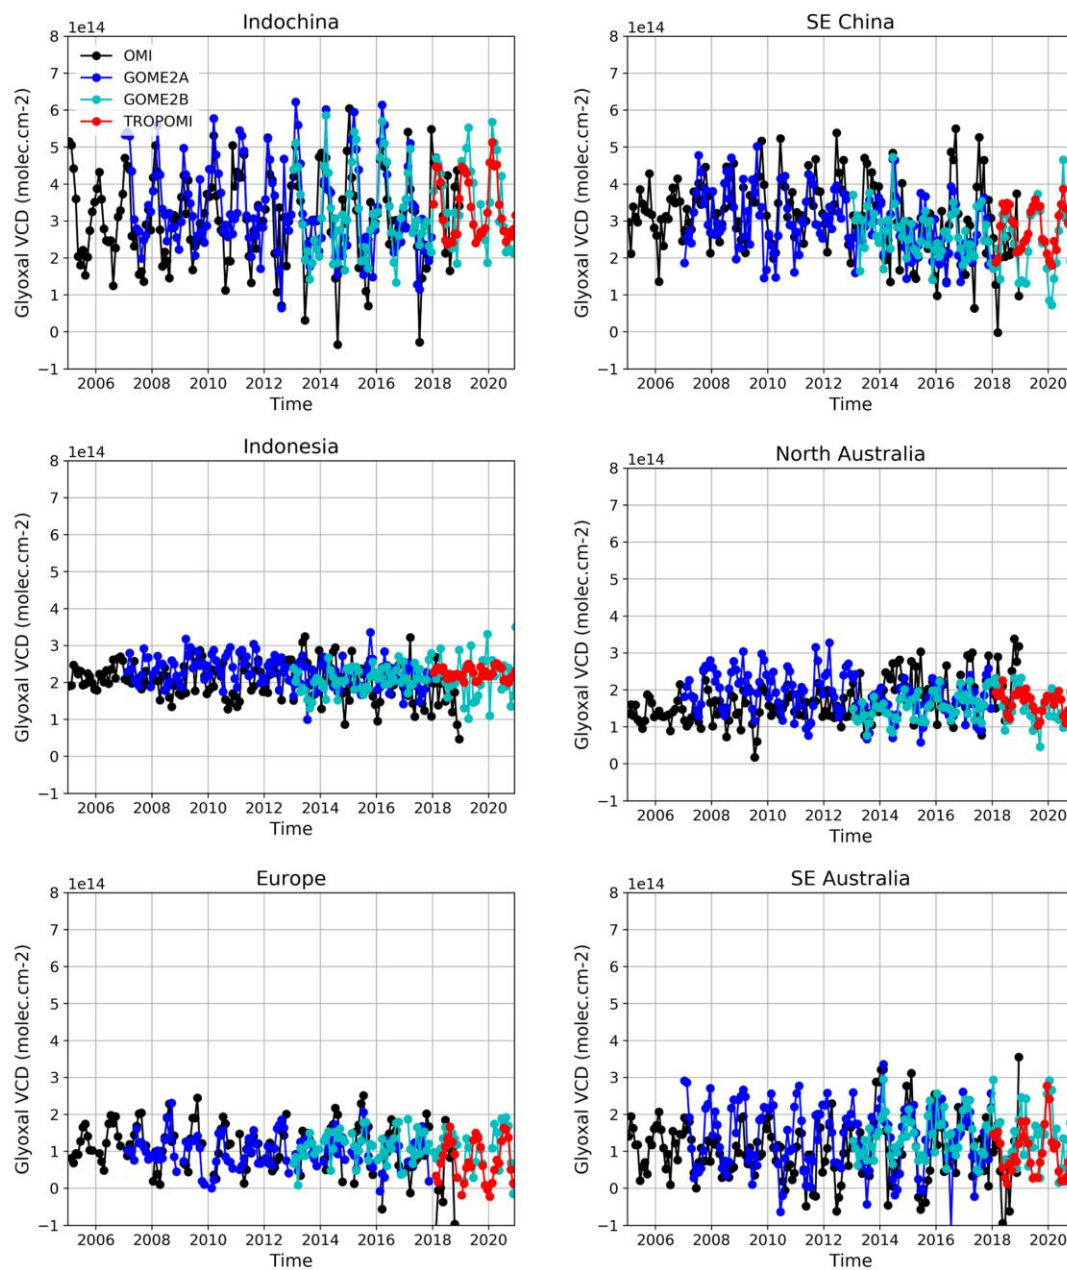

**Figure S1:** Comparison of the monthly median glyoxal VCD time series from GOME-2A/2B, OMI and TROPOMI in a few selected regions worldwide.

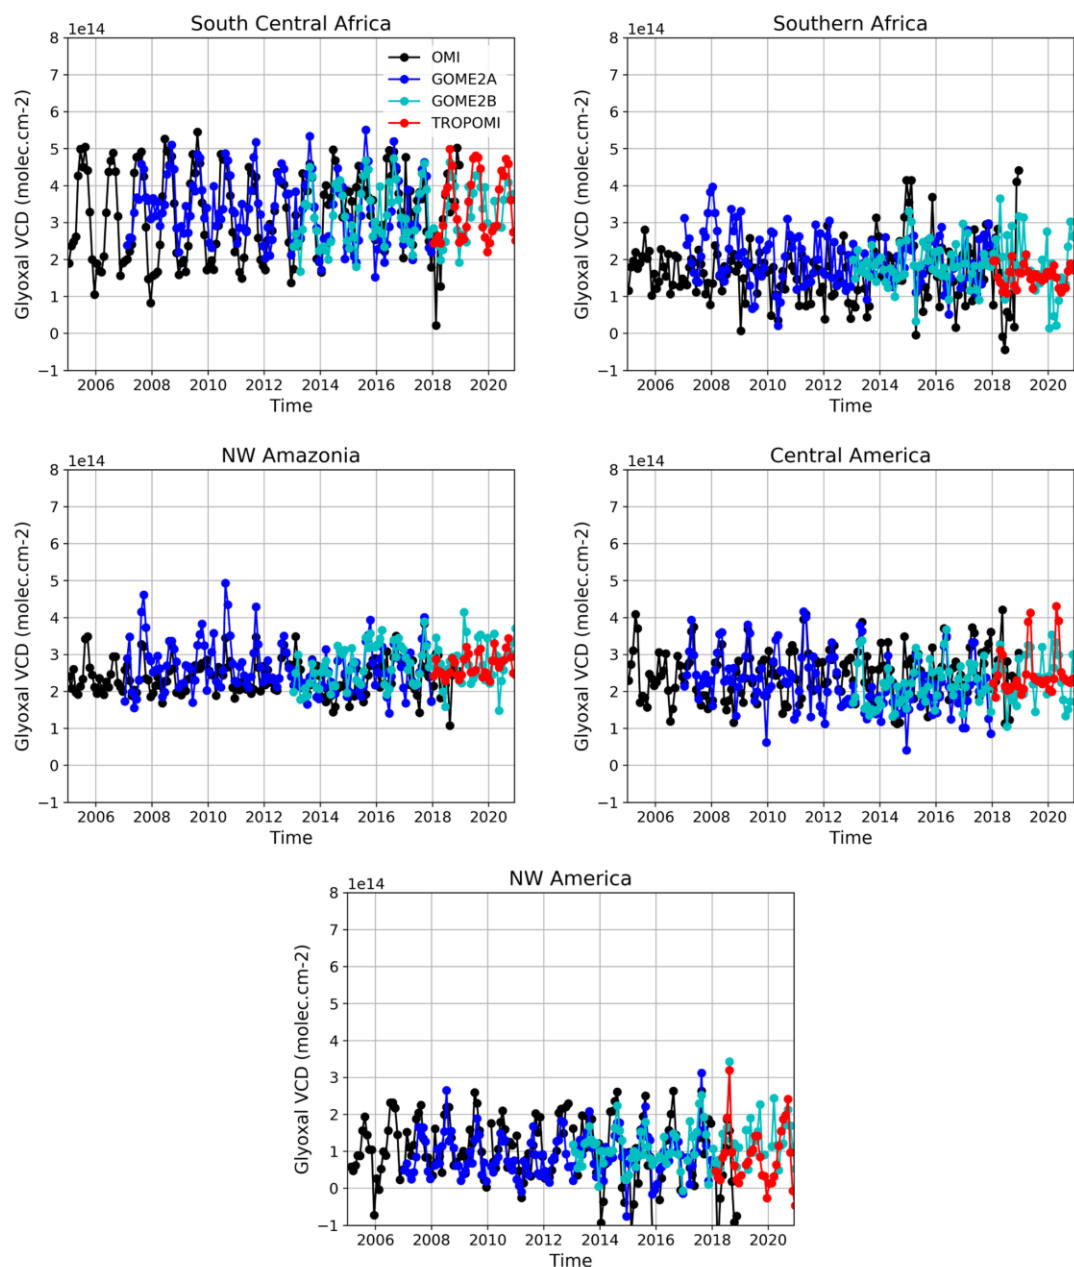

**Figure S2: Comparison of the monthly median glyoxal VCD time series from GOME-2A/2B, OMI and TROPOMI in a few selected regions worldwide.**

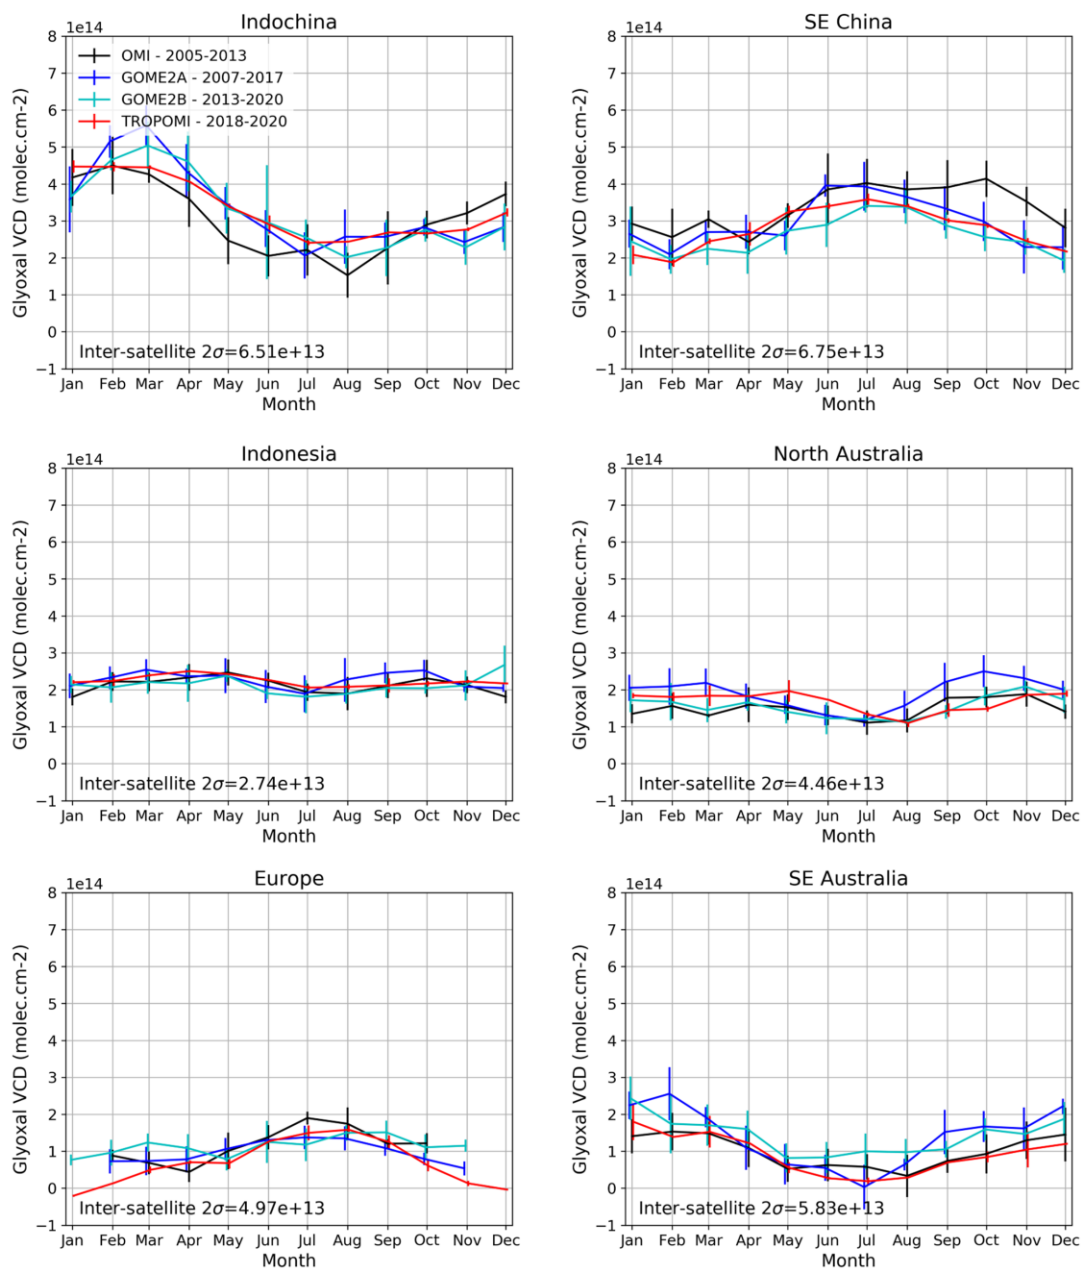

**Figure S3: Comparison of the climatological seasonal variation of the monthly median glyoxal VCDs from GOME-2A/2B, OMI and TROPOMI in a few selected regions worldwide. The error bars represent the interannual variability as derived from the full time series.**

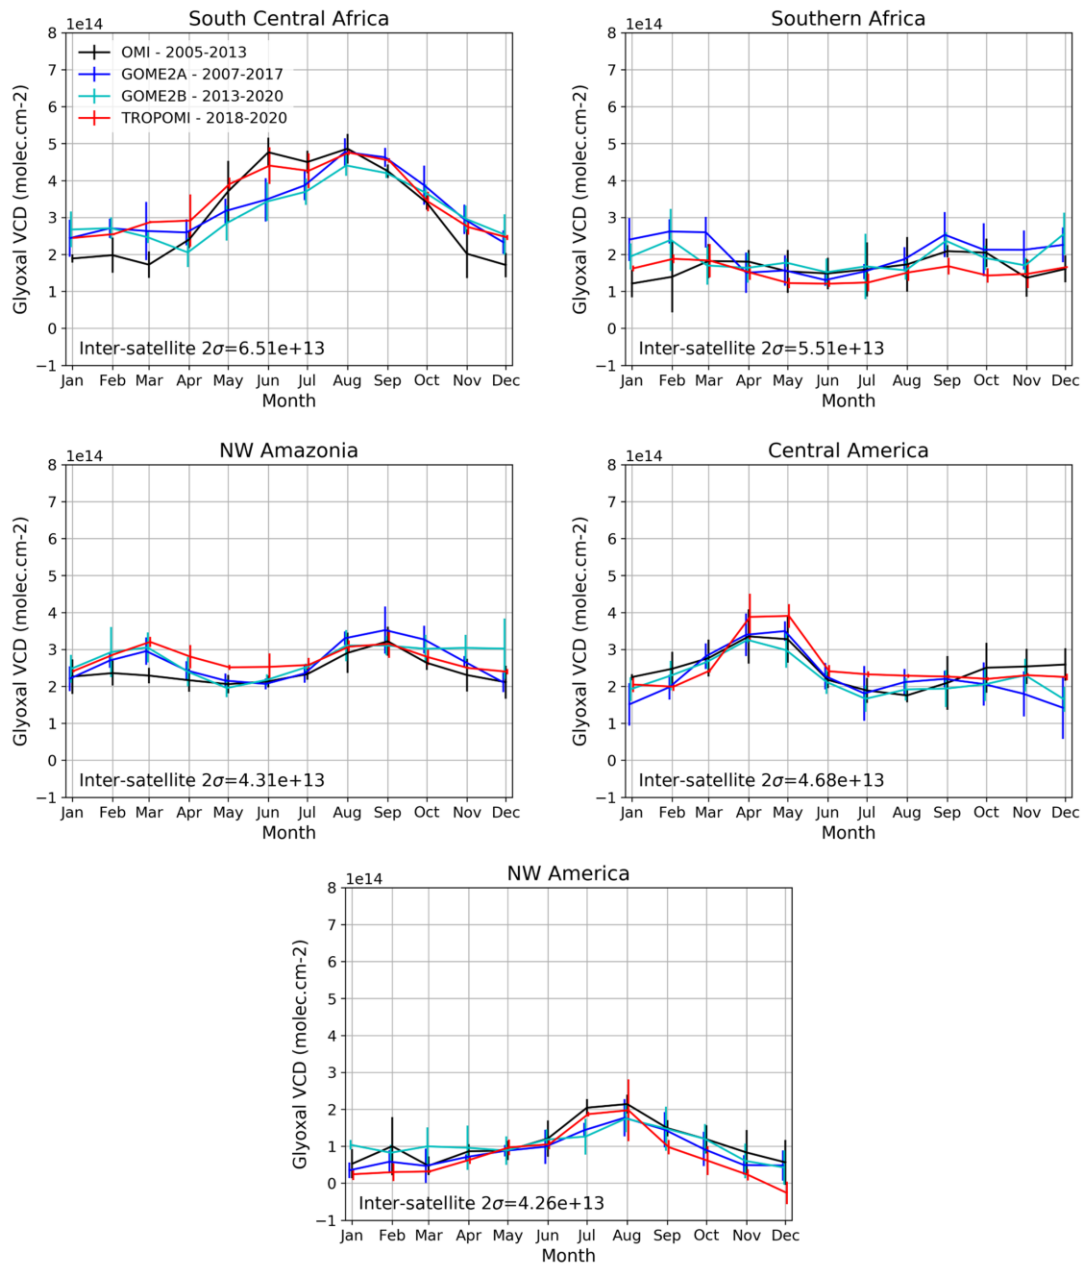

**Figure S4:** Comparison of the climatological seasonal variation of the monthly median glyoxal VCDs from GOME-2A/2B, OMI and TROPOMI in a few selected regions worldwide. The error bars represent the interannual variability as derived from the full time series.
